# Supplementary material for: Radiation-induced photodynamic therapy using calcium tungstate nanoparticles and 5-aminolevulinic acid prodrug
Source: Royal Society of Chemistry journal article supplement (doi:10.1039/d3bm00921a), 2023-01-01
Supplement: d3bm00921a1.pdf [file d3bm00921a1.pdf]

Electronic Supplementary Information (ESI) for

**Radiation-Induced Photodynamic Therapy Using Calcium Tungstate Nanoparticles and 5-Aminolevulinic acid Prodrug**

Dhushyanth Viswanath<sup>1</sup>, Sung-Ho Shin<sup>1</sup>, Jin Yoo<sup>1</sup>, Sandra E. Torregrosa-Allen<sup>2,3</sup>, Haley A. Harper<sup>2,3</sup>, Heidi E. Cervantes<sup>2,3</sup>, Bennett D. Elzey<sup>2,3</sup>, and You-Yeon Won<sup>\*,1,2</sup>

<sup>1</sup>Davidson School of Chemical Engineering, Purdue University, West Lafayette, Indiana 47907, United States, <sup>2</sup>Purdue University Institute for Cancer Research, <sup>3</sup>Department of Comparative Pathobiology, Purdue University, West Lafayette, Indiana 47907, United States.

\*Corresponding author

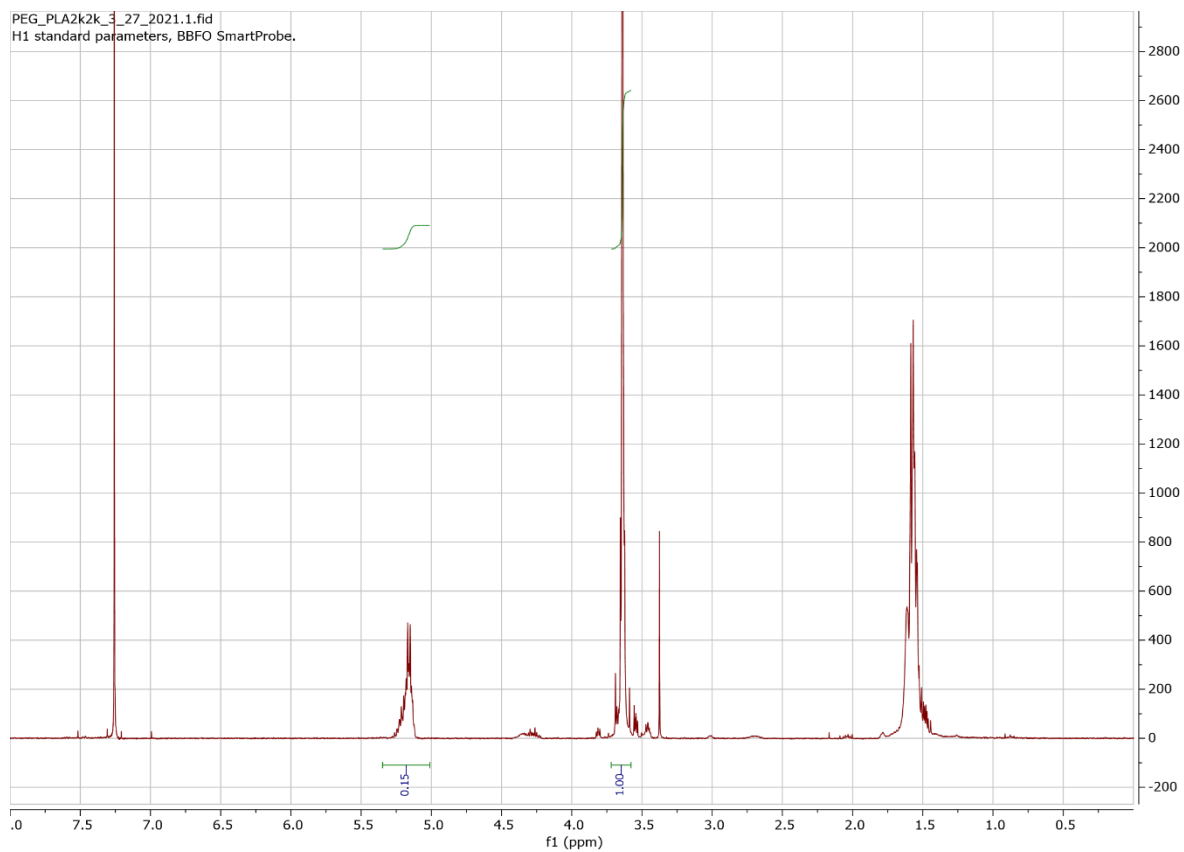

**Figure S1.**  $^1\text{H}$  NMR spectra for the PEG-PLA in  $\text{CDCl}_3$ . The  $M_n$  of the PLA block was calculated to be 1,932 Da from the area ratio of the peaks corresponding to the methyl protons ( $-\text{CH}_3$ ) in the lactate units of the PLA block (5.01 – 5.35 ppm) and the methylene protons ( $-\text{CH}_2-$ ) in the ethylene glycol units of the PEG block (3.58 – 3.72 ppm), assuming that the  $M_n$  of the PEG block is equal to 2,000 Da (information provided by the vendor).

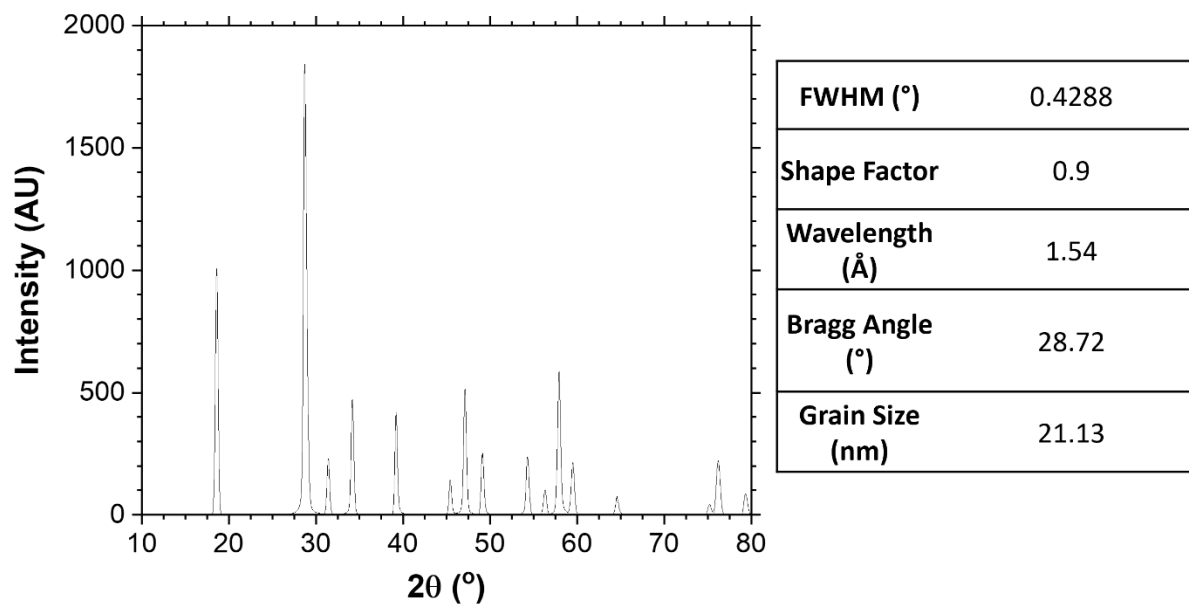

**Figure S2. X-ray diffraction (XRD) pattern of CWO NPs obtained in the parallel beam (PB) mode. The average crystallite (grain) size (presented in the accompanying table) was estimated from the XRD pattern using the Debye-Scherrer equation.**

**CWO NPs**

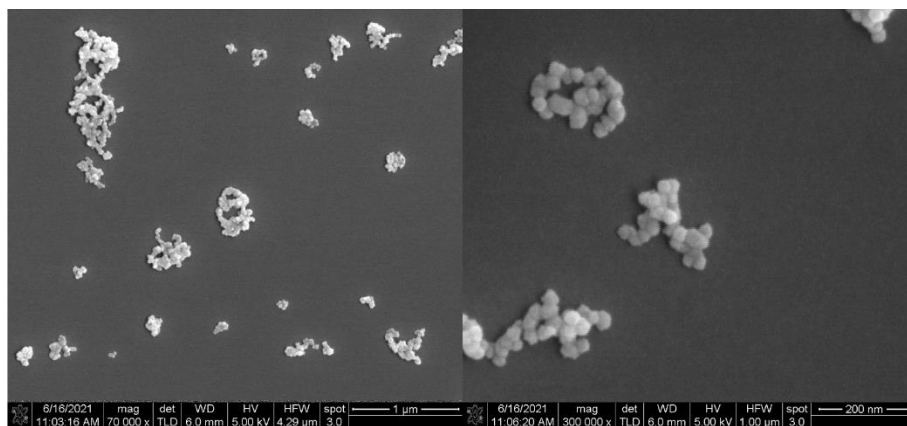

**PEG-  
PLA/CWO  
NPs**

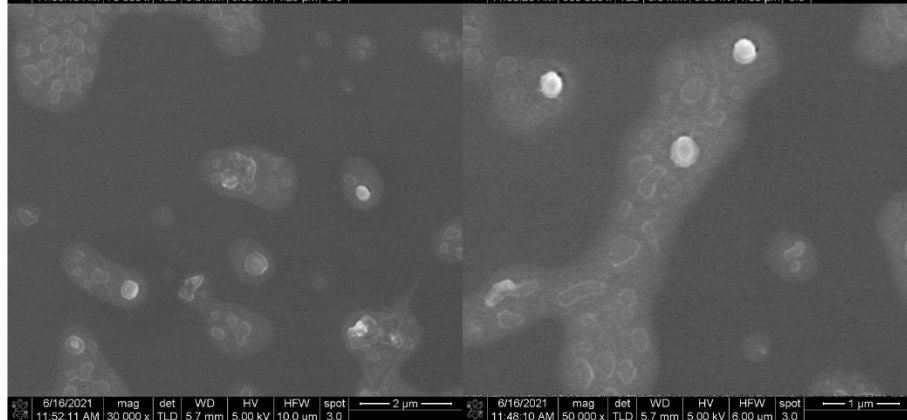

**Figure S3. Representative SEM images of (A) pristine (uncoated) CWO NPs and (B) PEG-PLA-encapsulated CWO NPs. NPs were dried on a silicon substrate for SEM imaging.**

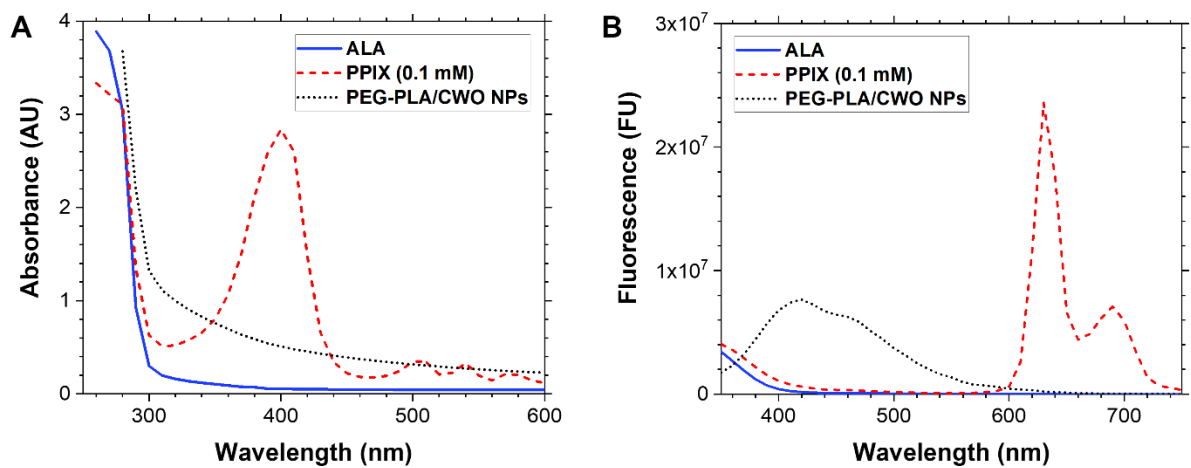

**Figure S4. (A) Absorbance and (B) fluorescence spectra of ALA (1.0 mM in a 50:50 by volume mixture of DMF and water), PPIX (0.1 mM in a 50:50 by volume mixture of DMF and water), and PEG-PLA/CWO NPs (0.1 mg/mL (based on CWO mass) in water). Step size for wavelength scanning = 10 nm. Excitation wavelength for fluorescence measurements = 250 nm.**

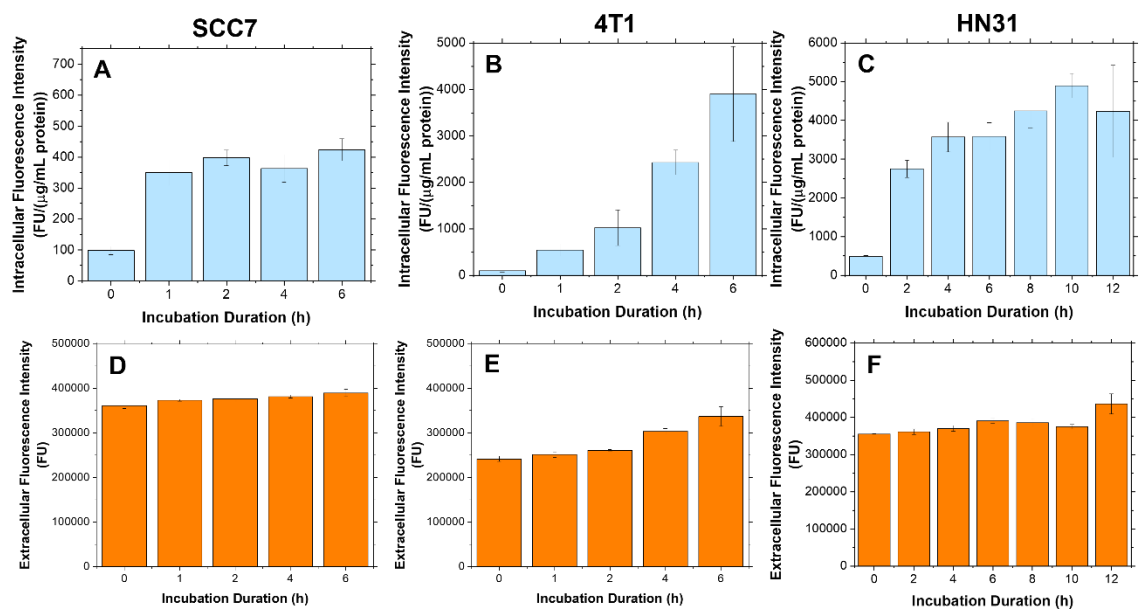

**Figure S5. (A – C) Intracellular and (D – F) extracellular PPIX fluorescence intensities in three different cell lines. The fluorescences were measured after varying durations of incubation with 1.0 mM ALA. The intracellular fluorescence intensity was normalized by the total protein concentration determined via BCA assay. Error bars represent standard deviations (N = 4).**

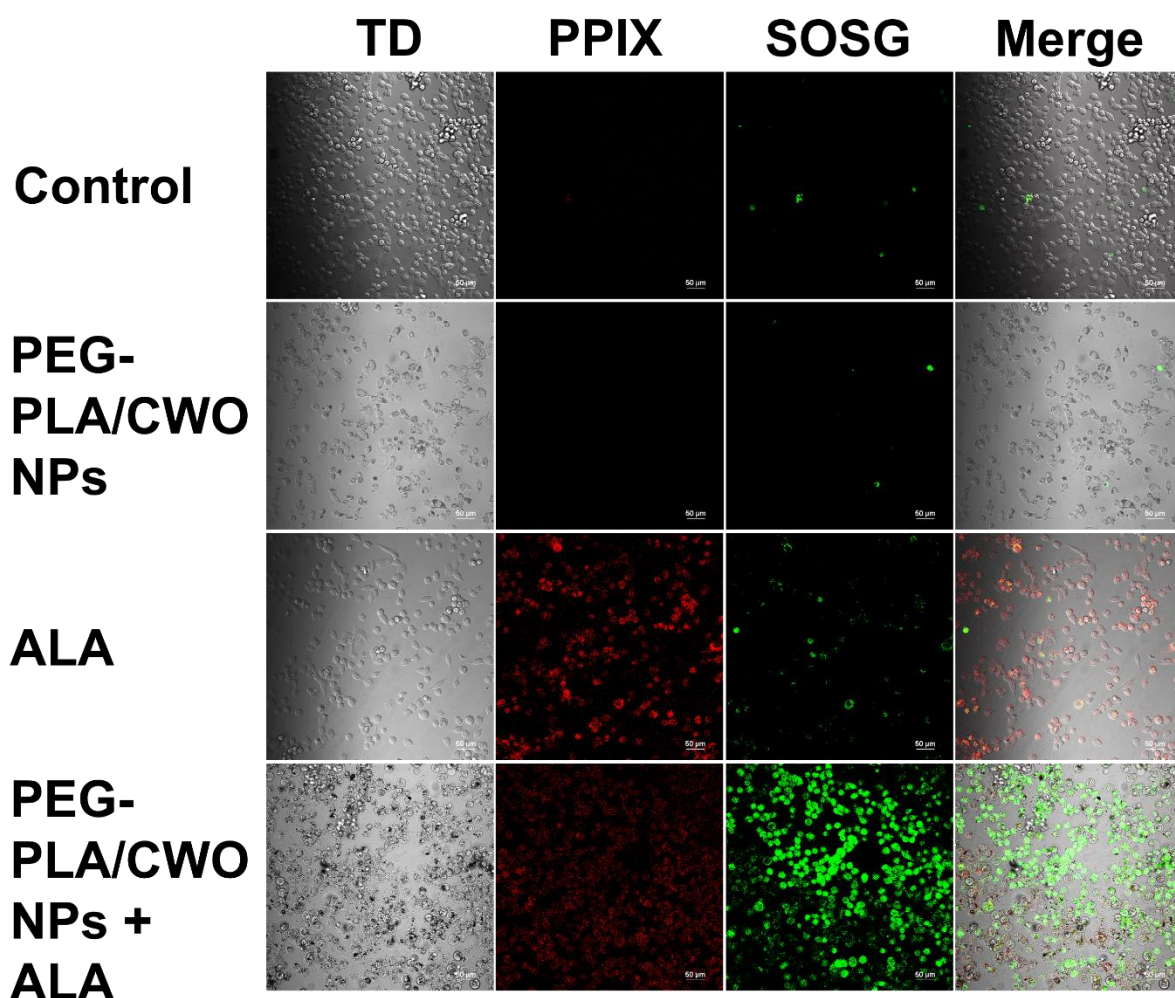

Figure S6. Low magnification confocal microscopy images of SCC7 cells treated with PEG-PLA/CWO NPs (0.2 mg/mL based on CWO mass), ALA (1mM) or a combination of the two. After overnight incubation, all samples were stained with SOSG and irradiated with 8 Gy X-rays. PPIX and SOSG were excited using 405 and 488 nm lasers, respectively. All images were acquired at identical laser settings and displayed with identical lookup table (LUT) values for direct comparison. Scale bar = 50  $\mu$ m.

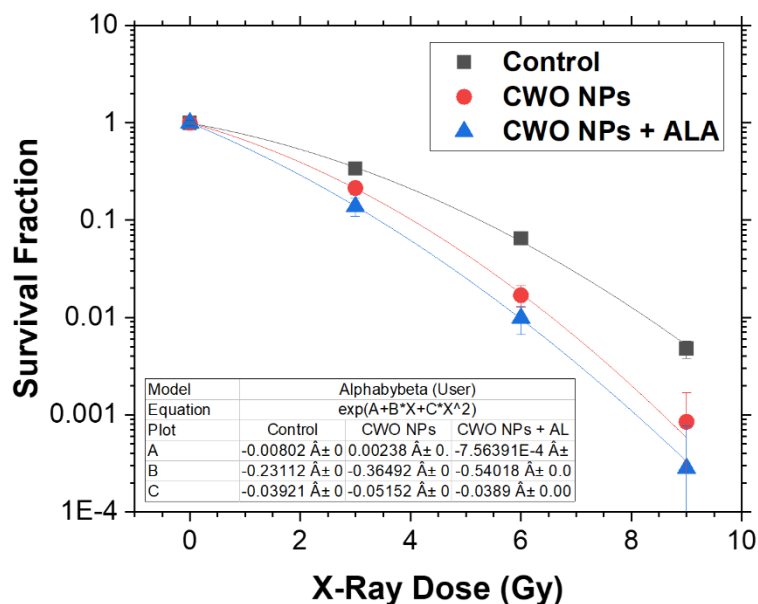

|                          | $\alpha$ | $\beta$ | $\alpha/\beta$ | SER   |
|--------------------------|----------|---------|----------------|-------|
| <b>Control</b>           | -0.231   | -0.039  | 5.894          | 1.000 |
| <b>CWO NPs</b>           | -0.365   | -0.052  | 7.083          | 1.304 |
| <b>CWO NPs<br/>+ ALA</b> | -0.540   | -0.039  | 13.886         | 1.534 |

**Figure S7. Clonogenic survival of HN31 cells post RT-PDT.** HN31 cells were plated in 6-well plates at densities of  $0.2 \times 10^3$ ,  $1.0 \times 10^3$ ,  $2.0 \times 10^3$  and  $5.0 \times 10^3$  cells/well for 0, 3, 6 and 9 Gy, respectively, incubated with CWO NPs (0.2 mg/mL), ALA (1.0 mM), or both, for 4 hours, and irradiated with varying doses of X-rays. Surviving colonies were counted after 6 cell division cycles (~ 14 – 15 days). Error bars represent standard deviations (N = 3). The survival curves were fit to the exponential quadratic decay formula,  $SF = \exp(\alpha D + \beta D^2)$  where  $SF$  = survival fraction, and  $D$  = X-ray dose (Gy), using  $\alpha$  and  $\beta$  as fitting parameters. The resulting  $\alpha/\beta$  and SER values (calculated at 10% cell survival) are given in the accompanying table.



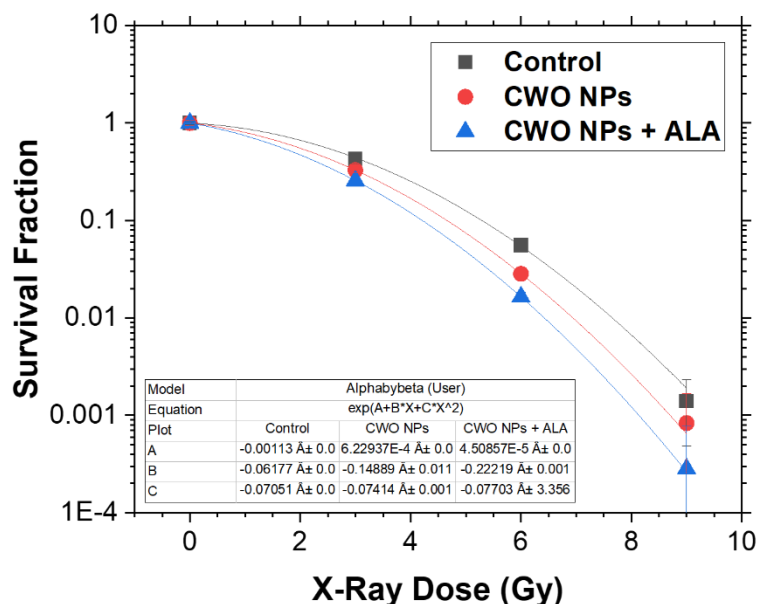

|               | $\alpha$ | $\beta$ | $\alpha/\beta$ | SER   |
|---------------|----------|---------|----------------|-------|
| Control       | -0.062   | -0.071  | 0.876          | 1.000 |
| CWO NPs       | -0.149   | -0.074  | 2.008          | 1.136 |
| CWO NPs + ALA | -0.222   | -0.077  | 2.884          | 1.256 |

**Figure S8. Clonogenic survival of SCC7 cells post RT-PDT.** SCC7 cells were plated in 6-well plates at densities of  $0.4 \times 10^3$ ,  $2.0 \times 10^3$ ,  $5.0 \times 10^3$  and  $10.0 \times 10^3$  cells/well for 0, 3, 6 and 9 Gy, respectively, incubated with CWO NPs (0.1 mg/mL), ALA (1.0 mM), or both, for 4 hours, and irradiated with varying doses of X-rays. Surviving colonies were counted after 6 cell division cycles (~ 6 – 7 days). Error bars represent standard deviations (N = 3). The survival curves were fit to the exponential quadratic decay formula,  $SF = \exp(\alpha D + \beta D^2)$  where  $SF$  = survival fraction, and  $D$  = X-ray dose (Gy), using  $\alpha$  and  $\beta$  as fitting parameters. The resulting  $\alpha/\beta$  and SER values (calculated at 10% cell survival) are given in the accompanying table.

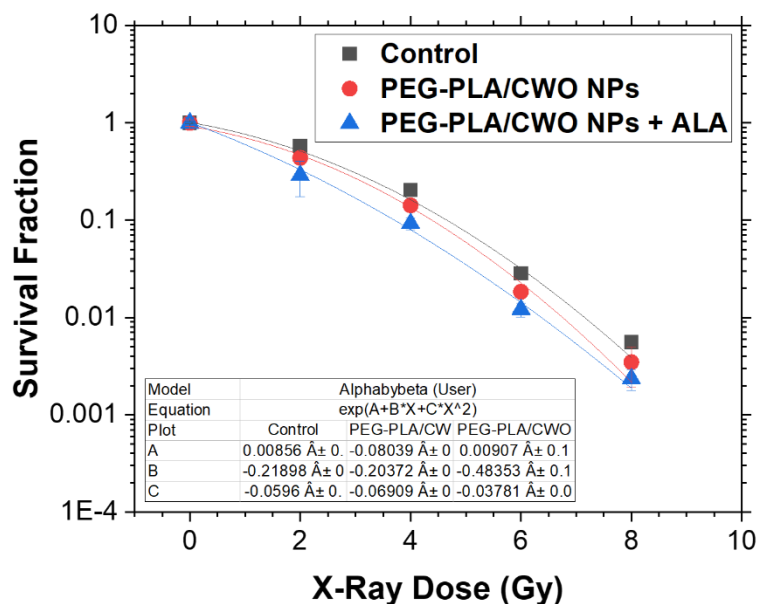

|                       | $\alpha$ | $\beta$ | $\alpha/\beta$ | SER   |
|-----------------------|----------|---------|----------------|-------|
| Control               | -0.219   | -0.060  | 3.674          | 1.000 |
| PEG-PLA/CWO NPs       | -0.204   | -0.069  | 2.952          | 1.062 |
| PEG-PLA/CWO NPs + ALA | -0.484   | -0.038  | 12.804         | 1.257 |

**Figure S9. Clonogenic survival of SCC7 cells post RT-PDT.** SCC7 cells were plated in 6-well plates at densities of  $0.4 \times 10^3$ ,  $1.0 \times 10^3$ ,  $2.0 \times 10^3$ ,  $5.0 \times 10^3$  and  $10.0 \times 10^3$  cells/well for 0, 2, 4, 6 and 8 Gy, respectively, incubated with PEG-PLA/CWO NPs (0.1 mg/mL based on CWO mass), ALA (1.0 mM), or both, for 4 hours, and irradiated with varying doses of X-rays. Surviving colonies were counted after 6 cell division cycles (~ 6 – 7 days). Error bars represent standard deviations (N = 3). The survival curves were fit to the exponential quadratic decay formula,  $SF = \exp(\alpha D + \beta D^2)$  where  $SF$  = survival fraction, and  $D$  = X-ray dose (Gy), using  $\alpha$  and  $\beta$  as fitting parameters. The resulting  $\alpha/\beta$  and SER values (calculated at 10% cell survival) are given in the accompanying table.

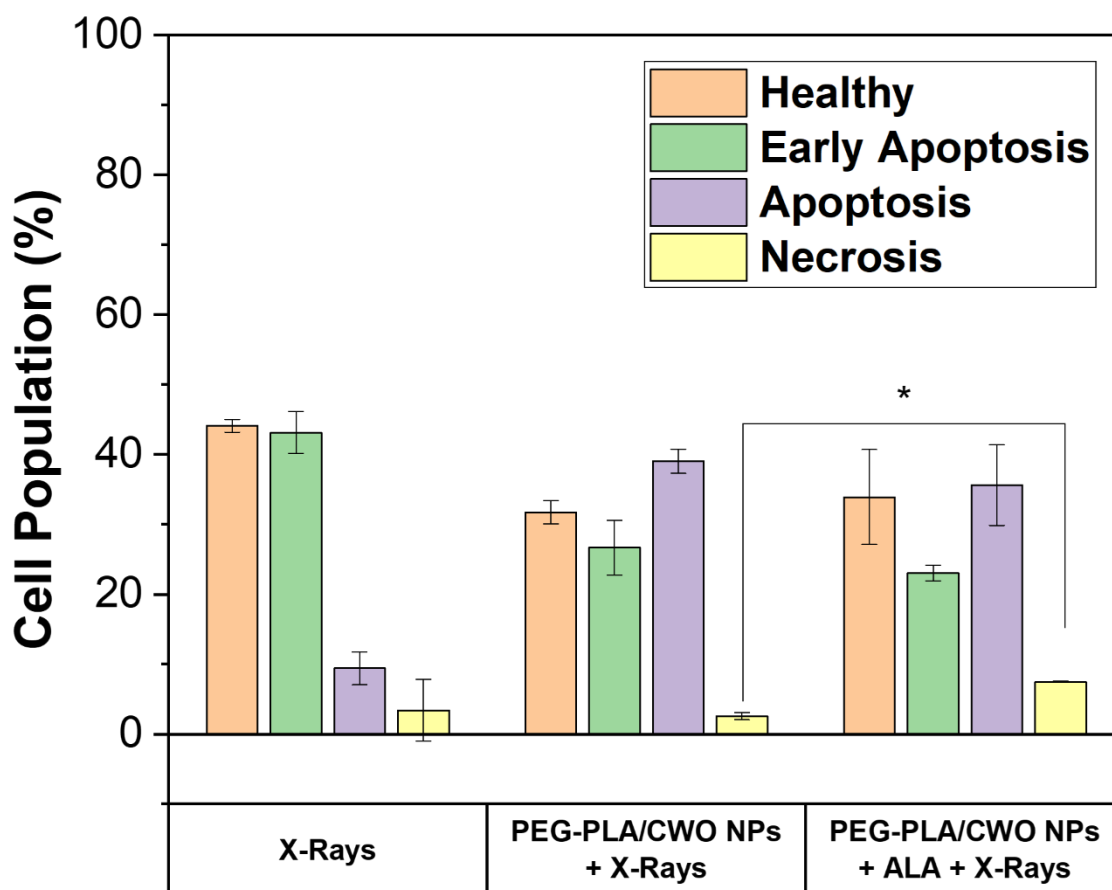

Figure S10. Mode of cell death in 4T1 cells. 4T1 cells were seeded in glass bottom dishes, treated with PEG-PLA/CWO NPs  $\pm$  ALA for 4 hours, irradiated with 8 Gy X-rays, incubated for 24 hours, and stained with FITC-Annexin V and Ethidium Homodimer-III for confocal microscopy analysis; see the Methods section for details. Brightfield images were segmented to isolate individual cells. The mean fluorescence intensity was calculated for each cell. Fluorescence intensities were gated against untreated 4T1 cells (control) and sorted as positive for FITC (early apoptosis), Ethidium Homodimer-III (necrosis), both (apoptosis), or neither (healthy).

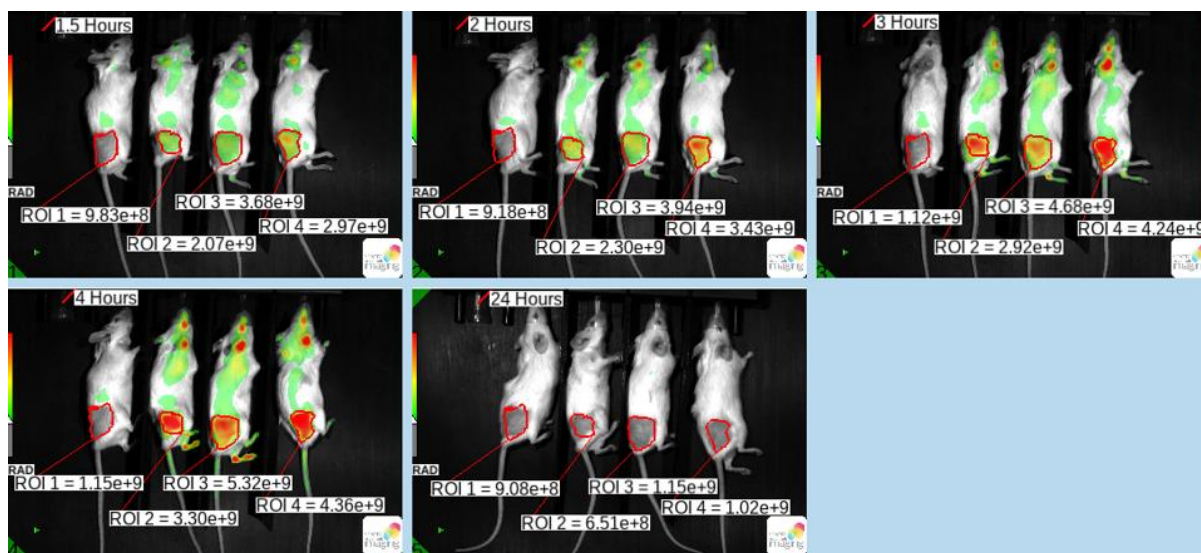

**Figure S11. Processed AMI images of tumor-bearing mice treated with ALA demonstrating intratumoral PPIX pharmacodynamics.** 4T1 allografts were established in BALB/c mice as described in the Methods section. Once tumors reached  $100 \text{ mm}^3$ , ALA ( $100 \mu\text{L}$ ,  $50 \text{ mg/mL}$  dissolved in PBS containing  $0.5 \%$  methyl cellulose) was administered to each mouse via oral gavage. PPIX production by ALA metabolism in tumor was tracked as a function of time using Spectral AMI ( $\lambda_{\text{ex}} = 430 \text{ nm}$ ,  $\lambda_{\text{em}} = 650 \text{ nm}$ ). The region of interest (ROI, tumor) is marked with a red circle. In each panel, the leftmost animal was untreated (control), and the 3 animals on the right were treated with ALA.

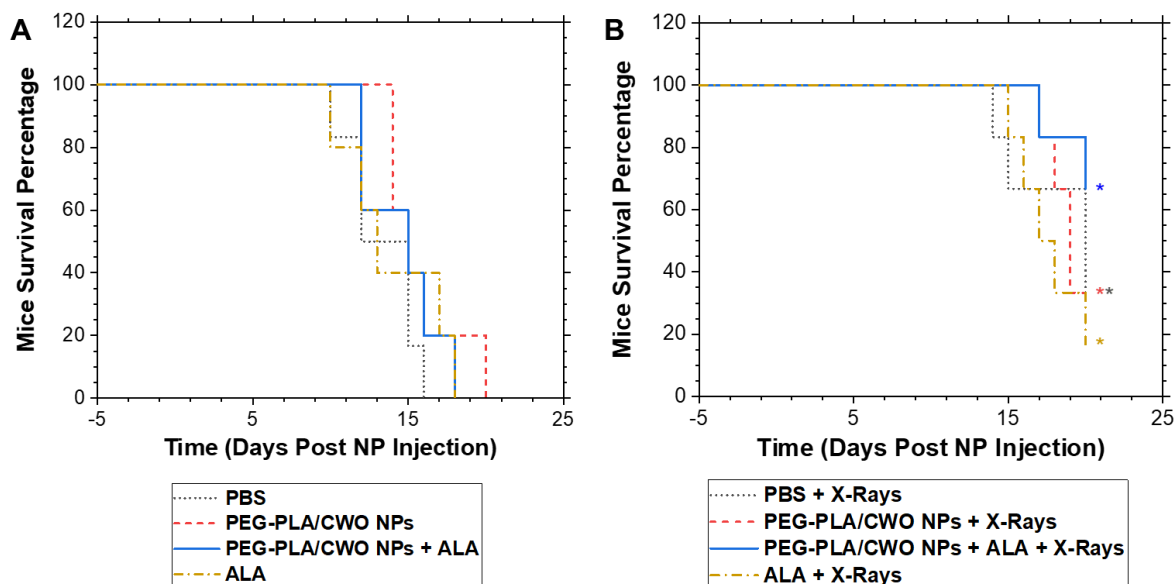

**Figure S12.** Kaplan-Meier curves for survival of BALB/c mice bearing 4T1 allografts treated with PEG-PLA/CWO NPs  $\pm$  ALA in the (A) absence and (B) presence of X-rays. 4T1 allograft tumor growth in BALB/c mice. 4T1 cells ( $5 \times 10^6$  cells/mL in PBS, 100  $\mu$ L) were subcutaneously implanted into the right flanks of BALB/c mice on Day -5. Once tumors reached  $\sim 75 - 100 \text{ mm}^3$ , blank PBS or NP suspensions in PBS (50 mg/mL based on CWO mass, 10  $\mu$ L per injection) were intratumorally injected at 0 and 1 days post 4T1 implantation. An ALA solution in PBS (50 mg/mL, 100  $\mu$ L per administration) containing 0.5% methyl cellulose was administered via oral gavage on Days 1 and 2. On each of those days, tumors were irradiated with 4 Gy X-rays at 4 hours post ALA administration. The study was concluded on Day 20 post NP Injection due to the significant ulceration observed in the tumors beyond that point; ulceration causes erroneous tumor volume measurements. A statistical analysis was performed on survival percentage data on Day 20 using log-rank analysis. See Table S1 for details of the analysis results. Asterisks have been used to denote the final survival percentages on Day 20.

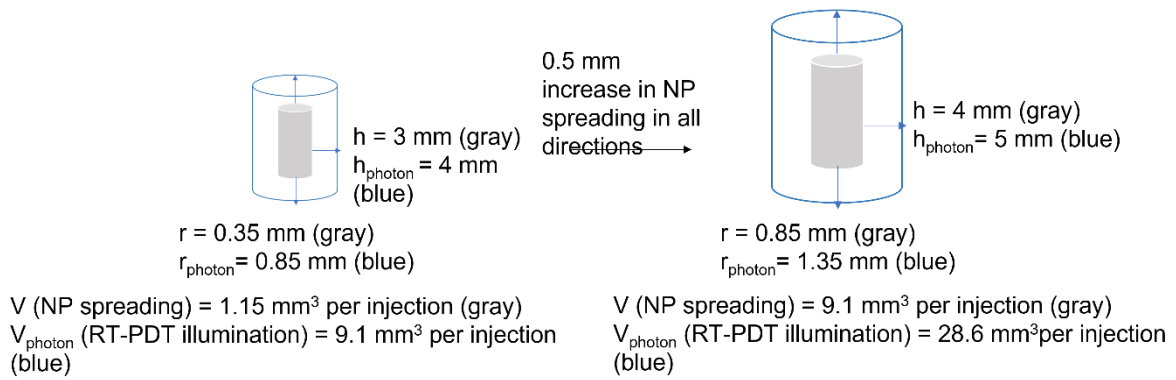

**Figure S13. Schematic explaining the calculating of the RT-PDT illumination volume within tumor.**

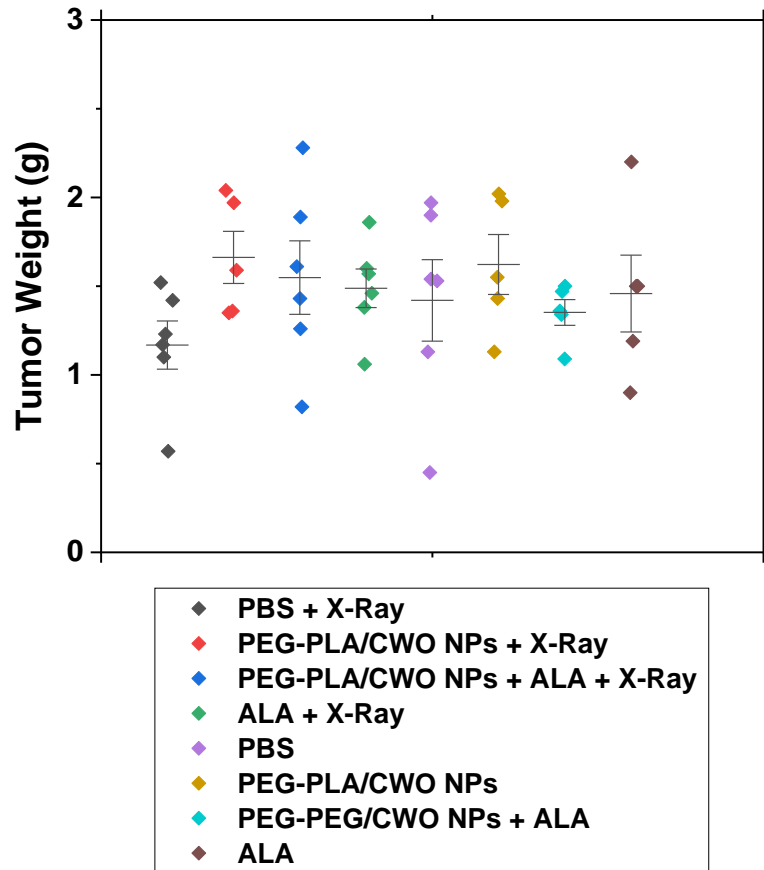

Figure S14. Tumor weights were measured after excision. It is important to note that the tumors were excised at different time points, and therefore direct comparisons between the groups do not accurately represent therapeutic efficacy.

**Table S1. Log-rank pairwise analysis of the mouse survival data presented in Figure S12. Pairs with statistically significant ( $p < 0.05$ ) and highly statistically significant ( $p < 0.01$ ) differences are highlighted in yellow and green, respectively.**

|           |                       | No X-Rays       |                       |       | X-Rays |                 |                       |       |
|-----------|-----------------------|-----------------|-----------------------|-------|--------|-----------------|-----------------------|-------|
|           |                       | PEG-PLA/CWO NPs | PEG-PLA/CWO NPs + ALA | ALA   | PBS    | PEG-PLA/CWO NPs | PEG-PLA/CWO NPs + ALA | ALA   |
| No X-Rays | PBS                   | 0.257           | 0.455                 | 0.507 | 0.031  | 0.002           | 0.002                 | 0.016 |
|           | PEG-PLA/CWO NPs       | -               | 0.853                 | 0.704 | 0.340  | 0.265           | 0.059                 | 0.464 |
|           | PEG-PLA/CWO NPs + ALA | -               | -                     | 0.764 | 0.101  | 0.021           | 0.011                 | 0.189 |
|           | ALA                   | -               | -                     | -     | 0.066  | 0.027           | 0.014                 | 0.218 |
| X-Rays    | PBS                   | -               | -                     | -     | -      | 0.801           | 0.866                 | 0.723 |
|           | PEG-PLA/CWO NPs       | -               | -                     | -     | -      | -               | 0.297                 | 0.800 |
|           | PEG-PLA/CWO NPs + ALA | -               | -                     | -     | -      | -               | -                     | 0.203 |
